# Supplementary material
Source: Springer Nature journal article supplement (https://www.springermedizin.de/resource/supplementary/12967_2009_339_MOESM4_ESM.pdf/9576258)

**LL-37 ng/mL**

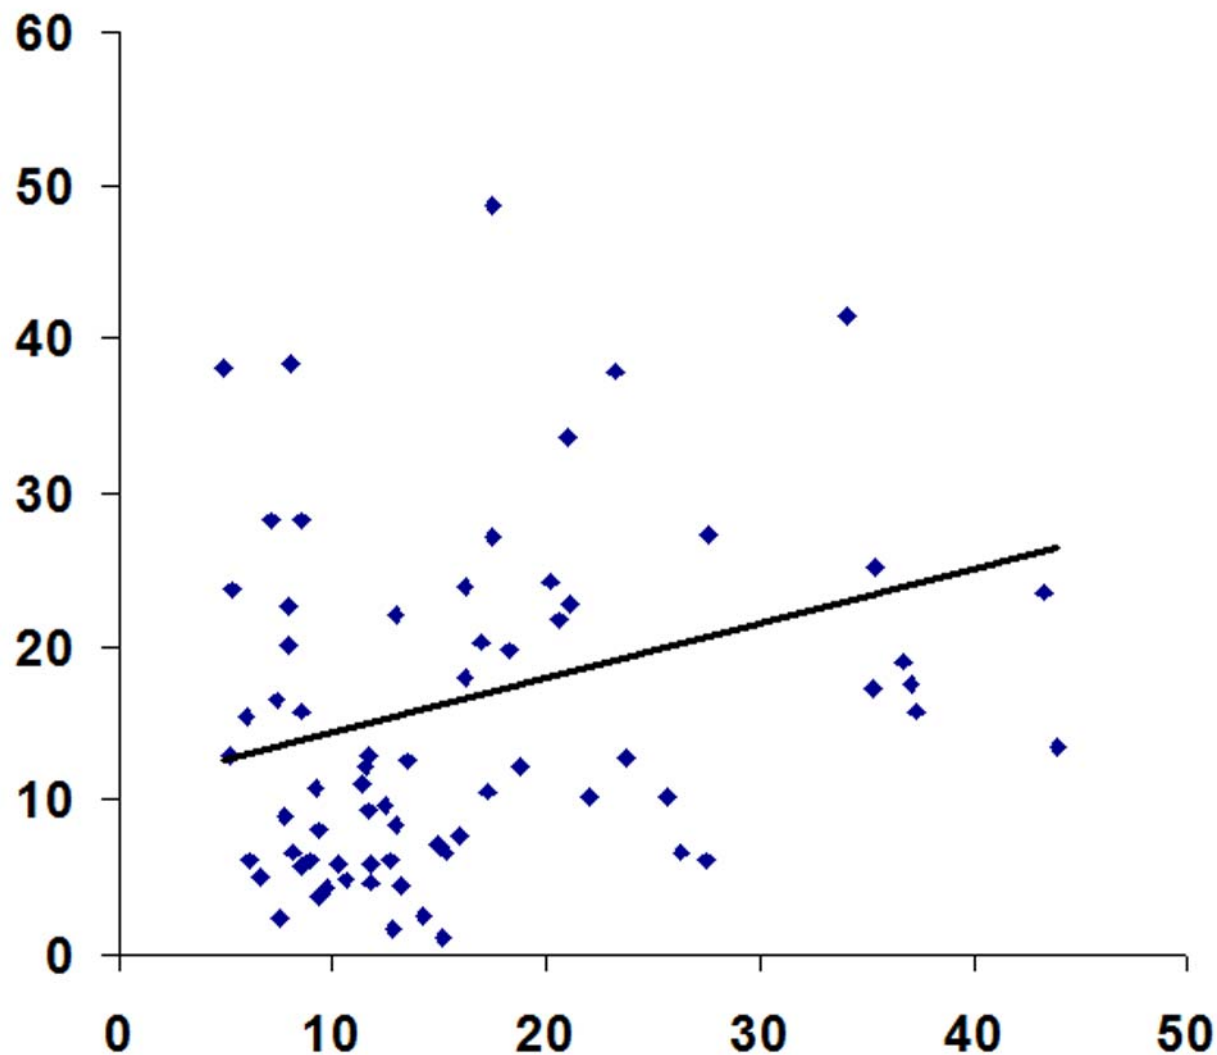

**25(OH)D ng/mL**

Supplement: MOESM4 [file 9576258]
